# Supplementary material for: The Incidence and Prevalence of Primary Central Nervous System (CNS) Tumours in Canada (2010–2017), and the Survival of Patients Diagnosed with CNS Tumours (2008–2017)
Source: MDPI journal article supplement (doi:10.3390/curroncol30040329), 2023-04-20
Supplement: s1 [file s1]

Supplementary Figure S1: Age-standardized incidence rate of primary CNS tumours from 2008 to 2017 in Canada (excluding Quebec) by tumour behavior.

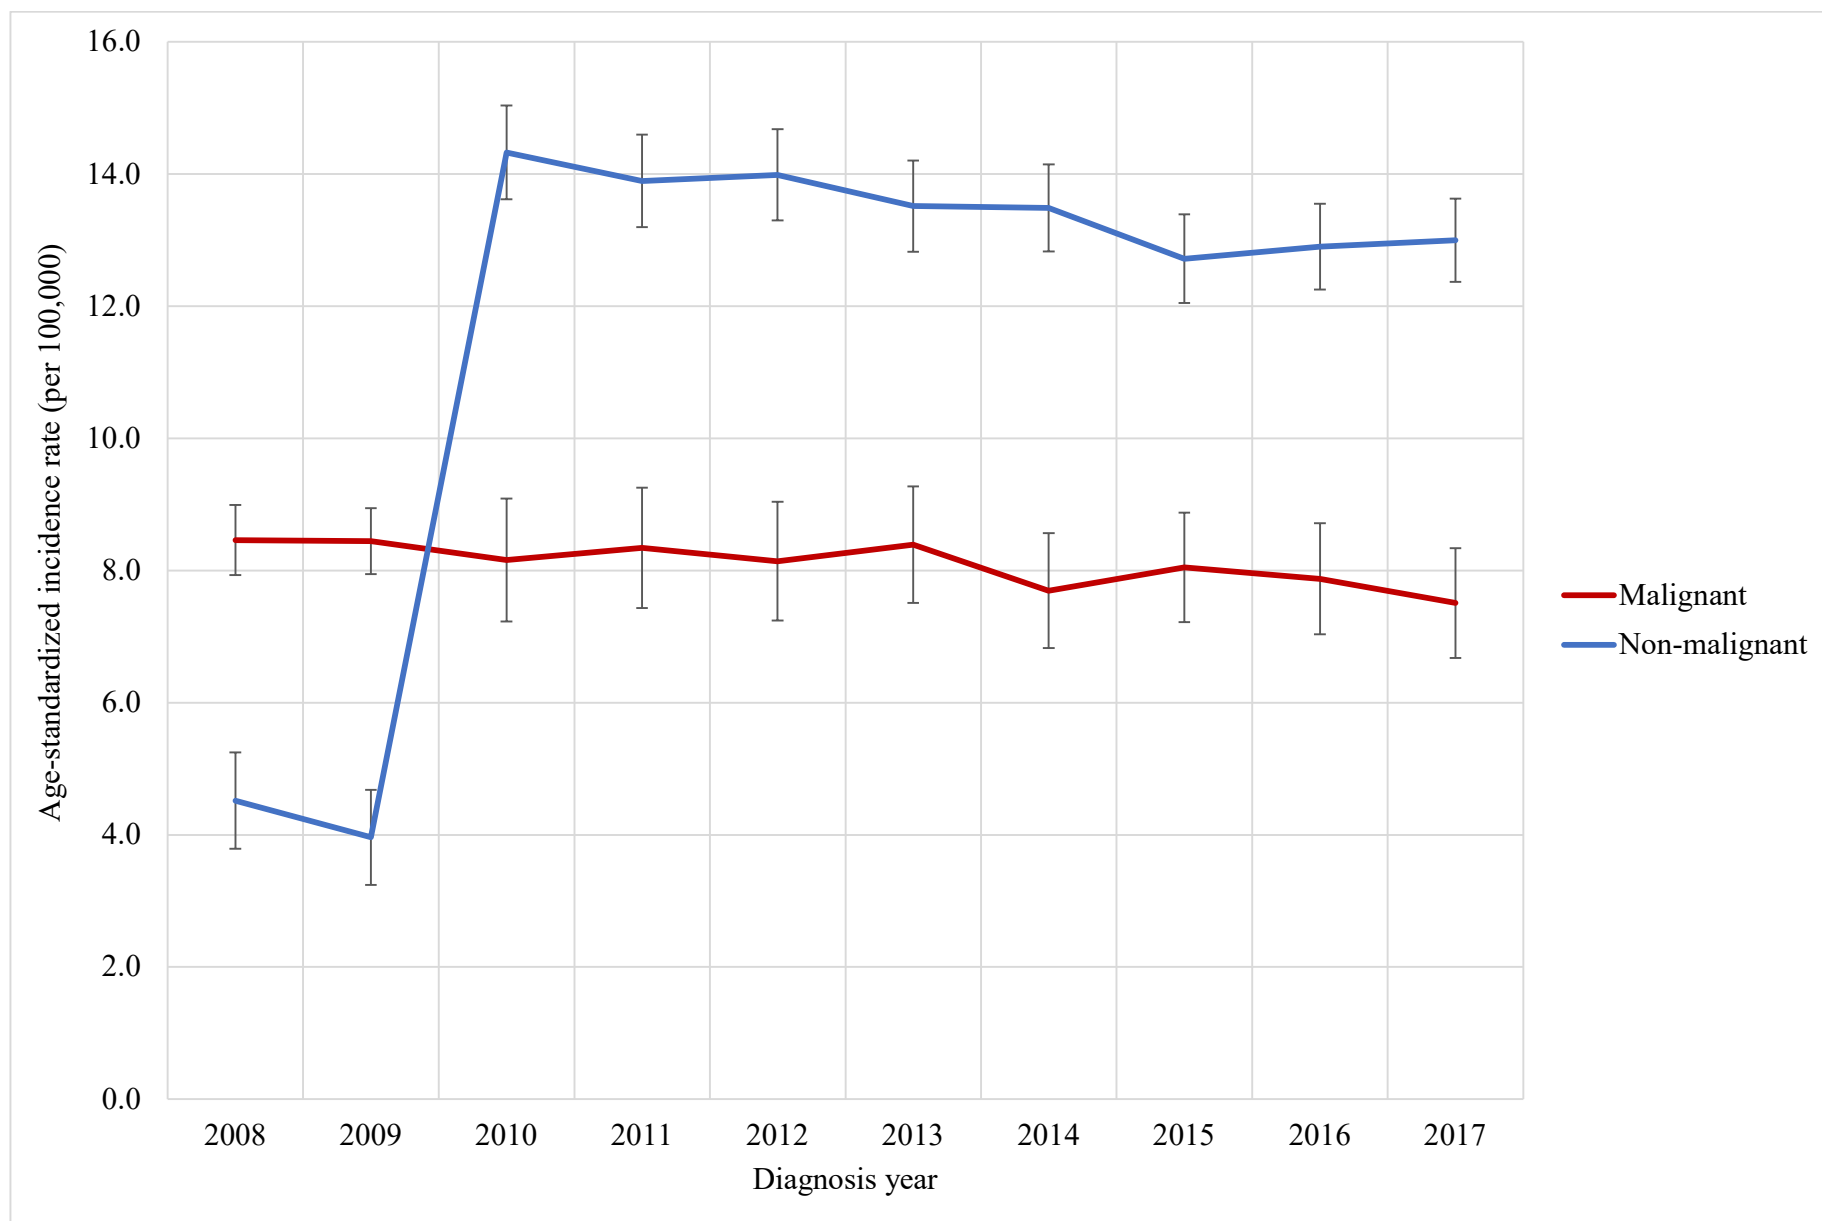

Supplementary Table S1: Proportion of unclassified primary CNS tumours diagnosed in Canada (excluding Quebec) between 2008 and 2017 by province and tumour behaviour.

| <b>Malignant</b>     | BC    | AB    | SK    | MB    | ON    | NB    | NS    | NL    |
|----------------------|-------|-------|-------|-------|-------|-------|-------|-------|
| 2008                 | 0.046 | 0.018 | –     | 0.063 | 0.174 | 0.083 | 0.048 | 0.100 |
| 2009                 | 0.065 | 0.036 |       | –     | 0.171 | 0.143 | 0.067 | –     |
| 2010                 | 0.059 | 0.021 |       | 0.063 | 0.094 | –     | 0.053 |       |
| 2011                 | 0.056 | 0.040 |       | –     | 0.100 | –     | –     |       |
| 2012                 | 0.027 | 0.040 |       | –     | 0.087 | –     | –     |       |
| 2013                 | 0.048 | 0.051 |       | 0.048 | 0.095 | –     | –     |       |
| 2014                 | 0.079 | 0.036 |       | 0.059 | 0.082 | –     | –     |       |
| 2015                 | 0.038 | 0.051 |       | –     | 0.083 | –     | –     |       |
| 2016                 | 0.064 | 0.017 |       | –     | 0.080 | –     | 0.059 |       |
| 2017                 | 0.051 | 0.038 |       | 0.095 | 0.065 | 0.071 | 0.053 |       |
| <b>Non-malignant</b> | BC    | AB    | SK    | MB    | ON    | NB    | NS    | NL    |
| 2008                 | 0.018 | 0.024 | 0.059 | 0.083 | .     | –     | –     | –     |
| 2009                 | 0.036 | 0.027 | –     | 0.031 | .     |       |       |       |
| 2010                 | 0.048 | 0.024 |       | 0.067 | 0.358 |       |       |       |
| 2011                 | 0.034 | 0.036 |       | 0.075 | 0.341 |       |       |       |
| 2012                 | 0.038 | 0.022 |       | 0.034 | 0.350 |       |       |       |
| 2013                 | 0.029 | 0.022 |       | 0.031 | 0.368 |       |       |       |
| 2014                 | 0.029 | 0.022 |       | –     | 0.380 |       |       |       |
| 2015                 | 0.032 | 0.033 |       | 0.037 | 0.379 |       |       |       |
| 2016                 | 0.073 | 0.034 |       | –     | 0.380 |       |       |       |
| 2017                 | 0.056 | 0.039 |       | –     | 0.427 |       |       |       |

Data sources: Canadian Cancer Registry at Statistics Canada

Province abbreviations are as follows: BC = British Columbia; AB = Alberta; SK = Saskatchewan; MB = Manitoba; ON = Ontario; NB = New Brunswick; NS = Nova Scotia; NL= Newfoundland & Labrador. – indicates number is suppressed. Numbers are suppressed in the Yukon and Prince Edward Island for all years and both behaviours. . indicates missing data.
